# Supplementary material for: Comprehensive analysis of single cell ATAC-seq data with SnapATAC
Source: Springer Nature journal article supplement (doi:10.1038/s41467-021-21583-9), 2021-02-26
Supplement: MOESM1 [file 41467_2021_21583_MOESM1_ESM.pdf]

| <b>ID</b> | <b>Index Sequence</b> |
|-----------|-----------------------|
| T5_9      | TTCGGAAG              |
| T5_10     | AGGCTGGT              |
| T5_11     | GGAAGACT              |
| T5_12     | GAACGCAT              |
| T5_13     | TGCTGGTA              |
| T5_14     | CATTCAGT              |
| T5_15     | ACAAGGAT              |
| T5_16     | TGTCAGCT              |
| T7_12     | CTATTAGG              |
| T7_13     | CATGTCAG              |
| T7_14     | CTCATACA              |
| T7_15     | AGATCTTC              |
| T7_16     | AGAGCAGT              |
| T7_17     | AGACGGAG              |
| T7_18     | TGTGCAAC              |
| T7_19     | ACATTGGC              |
| T7_20     | TGTTACCA              |
| T7_21     | GCTCTAAG              |
| T7_22     | TATCGGTT              |
| T7_23     | CAGTTGCA              |

**Supplementary Table 4. Index sequences used in the single nucleus ATAC-seq.**
